# Supplementary material for: Liver Transcriptomic Reveals Novel Pathways of Empagliflozin Associated With Type 2 Diabetic Rats
Source: PubMed Central journal article supplement (PMC7092631; doi:10.3389/fendo.2020.00111), 2020-03-17
Supplement: Image_1.pdf [file Image_1.pdf]

Supplementary Material

1. Supplementary Figures

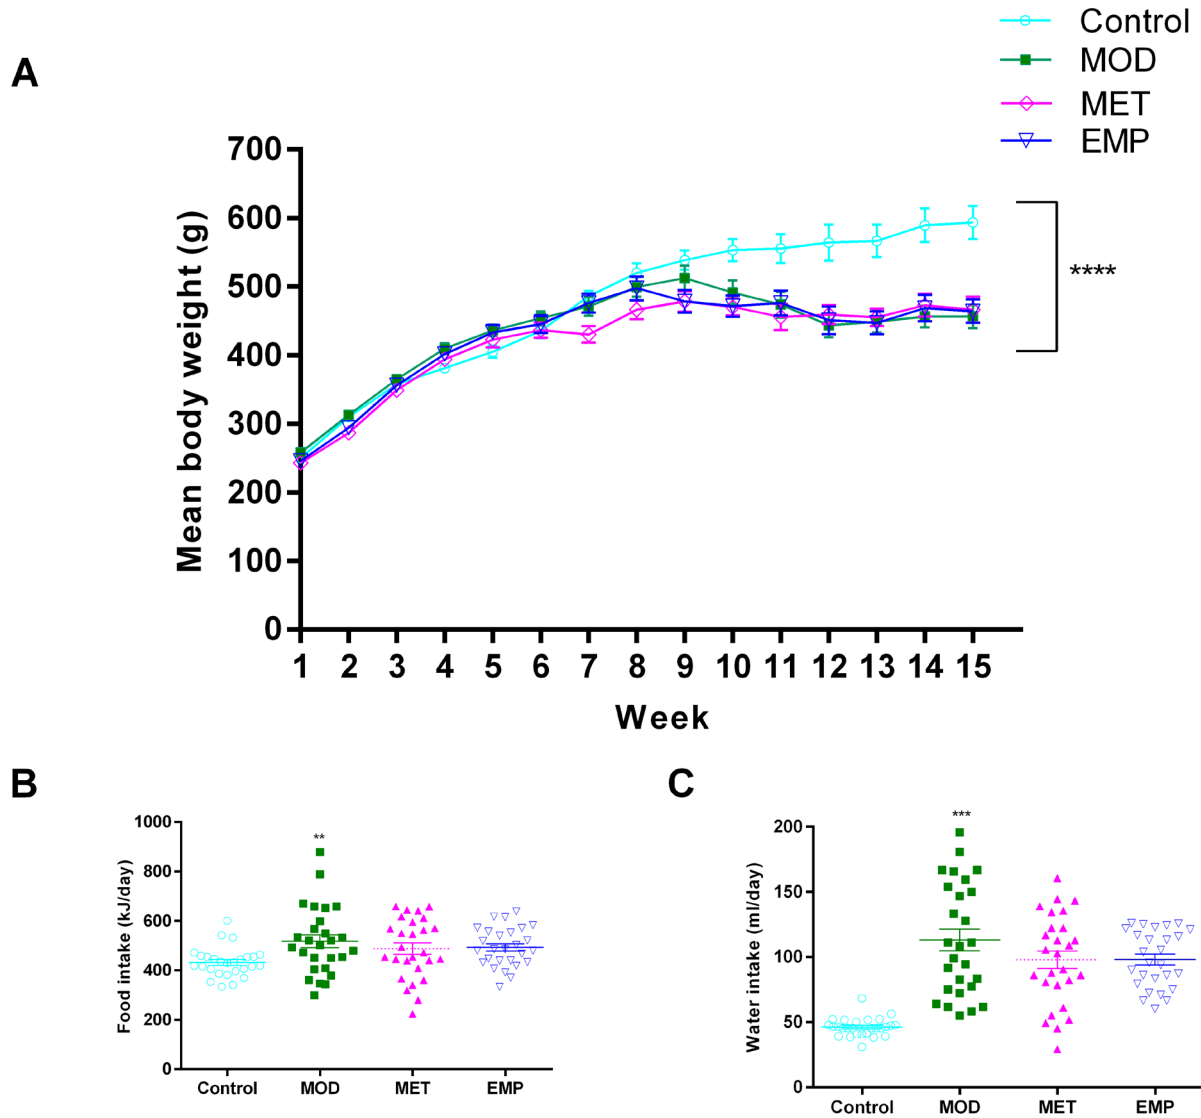

**Supplementary Figure 1.** The impact of MET and EMP on body weight, food intake and water intake. (A) Body weight. (B) Food intake. (C) Water intake. Notes: \* $p < 0.05$ , \*\* $p < 0.01$ , \*\*\* $p < 0.001$ , \*\*\*\* $p < 0.0001$  vs. Control. Data are presented as means  $\pm$  SEM.
